# Supplementary material for: Covalent immobilization of lipase on an ionic liquid-functionalized magnetic Cu-based metal–organic framework with boosted catalytic performance in flavor ester synthesis
Source: Royal Society of Chemistry journal article supplement (doi:10.1039/d2tb02246j), 2023-01-01
Supplement: d2tb02246j1.pdf [file d2tb02246j1.pdf]

Covalent immobilization of lipase on ionic liquids-functionalized  
magnetic Cu-based metal-organic framework with boosted catalytic  
performance in flavor esters synthesis

Hongbo Suo <sup>a</sup>, Huining Geng <sup>a</sup>, Lu Zhang <sup>a</sup>, Guoyun liu <sup>a</sup>, Rui Cao <sup>a</sup>, Jie Yang <sup>a</sup>,  
Jiahao Zhu <sup>a</sup>, Yi Hu <sup>b, \*</sup>, Lili Xu <sup>a, \*</sup>

<sup>a</sup> School of Pharmaceutical Sciences, Liaocheng University, Liaocheng, Shandong,  
252059, China

<sup>b</sup> State Key Laboratory of Materials-Oriented Chemical Engineering, School of  
Pharmaceutical Sciences, Nanjing Tech University, Nanjing 210009, China

\*Corresponding authors

Yi Hu, Professor

E-mail: huyi@njtech.edu.cn

Lili Xu, Doctor

E-mail: lilixu66@163.com

**Details of characterization condition and devices**

The Fourier-transform infrared spectra (FTIR) were measured on a Nicolet iS50 (Thermo Scientific, USA) under the range of 400–4000 cm<sup>-1</sup>. X-ray diffraction spectra (XRD) were measured under the scanning rate of 4–8°min<sup>-1</sup> on a Bruker D8-Advance diffractometer (Germany). Transmission electron microscopy (TEM) images were obtained from a Tecnai G2 F20 (FEI, USA). Scanning electron microscopy images (SEM) were obtained from a Quanta 400 FEG (FEI, USA). The magnetic properties of supports were measured using a vibrating sample magnetometer (VSM, Quantum Design) under the range of 30–30 KOe. Thermogravimetric analysis (TGA) was measured in the temperature range of 30–800°C, with a heating rate of 10°C min<sup>-1</sup> under an N<sub>2</sub> atmosphere on an STA 409 PC (NETZSH, Germany). Circular dichroism (CD) was conducted on a JASCO J1500 (Japan) spectrometer in the range of 190–250 nm.

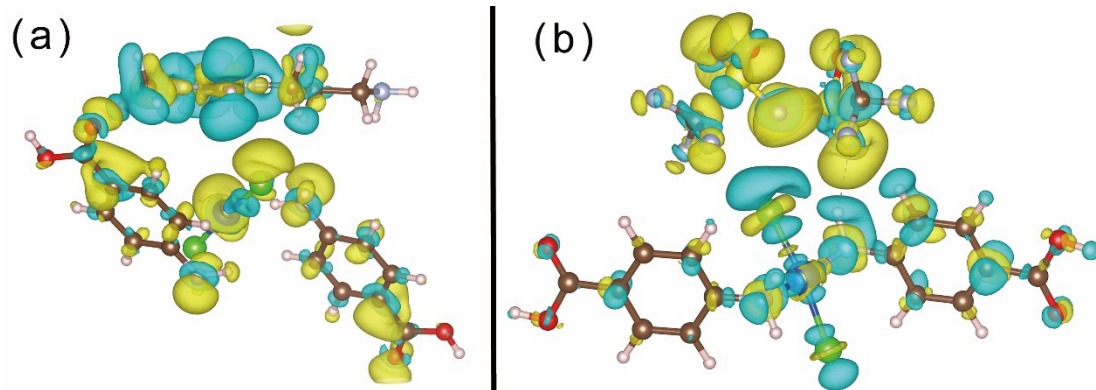

Fig. S1. Charge density difference map of [AMI]<sup>+</sup>/Fe<sub>3</sub>O<sub>4</sub>@MOF (a) and [TNf<sub>2</sub>]<sup>-</sup>/Fe<sub>3</sub>O<sub>4</sub>@MOF (b). Blue denoted the decrease of charge, and yellow denoted charge accumulation.

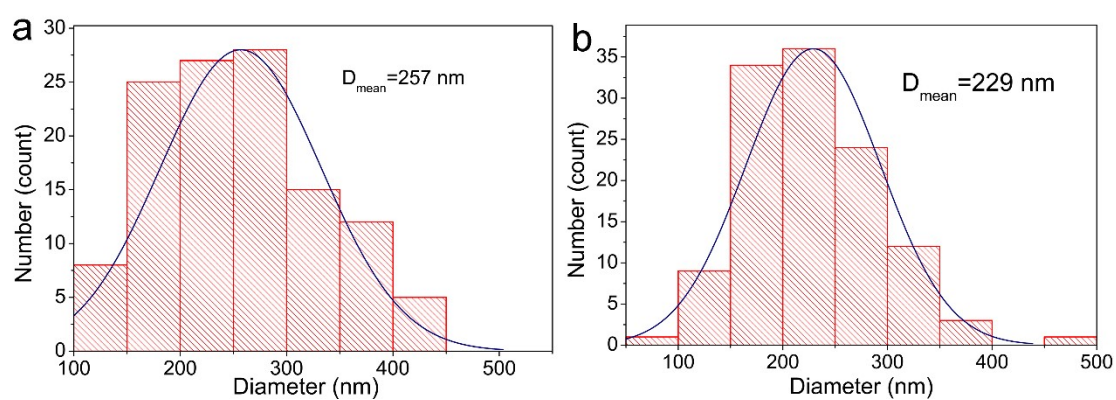

Fig. S2. Diameter distribution of (a) Fe<sub>3</sub>O<sub>4</sub>@MOF and (b) ILs/Fe<sub>3</sub>O<sub>4</sub>@MOF

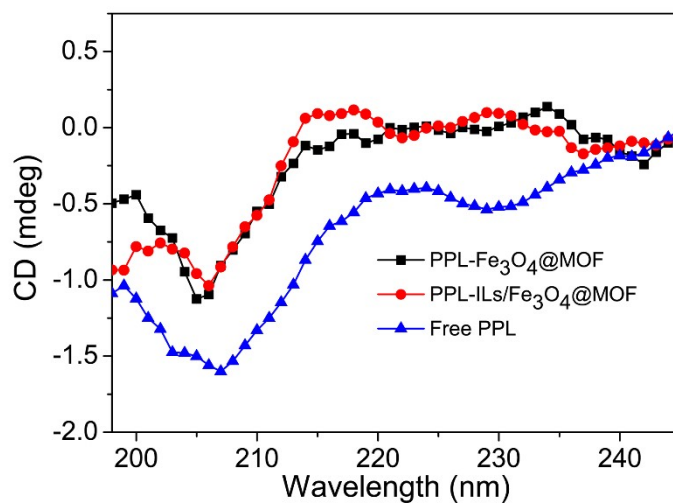

Fig. S3. CD spectra of immobilized and free PPL
